# Supplementary material
Source: PubMed Central journal article supplement (PMC2995300)
Supplement: NIHMS251693-supplement-1_si_001.pdf [file NIHMS251693-supplement-1_si_001.pdf]

## Supporting Information

### Synthesis, Structural and Spectroscopic Characterization, and Reactivities of Mononuclear Cobalt(III)-Peroxo Complexes

Jaeheung Cho,<sup>1</sup> Ritimukta Sarangi,<sup>2</sup> Hye Yeon Kang,<sup>1</sup> Jung Yoon Lee,<sup>1</sup> Minoru Kubo,<sup>3</sup> Takashi  
Ogura,<sup>3</sup> Edward I. Solomon,<sup>2,4</sup> and Wonwoo Nam\*<sup>1</sup>

<sup>1</sup>Department of Bioinspired Science, Department of Chemistry and Nano Science, Center for  
Biomimetic Systems, Ewha Womans University, Seoul 120-750, Korea

<sup>2</sup>Stanford Synchrotron Radiation Lightsource, SLAC National Accelerator Laboratory, Menlo  
Park, California 94025, USA

<sup>3</sup>Picobiology Institute, Graduate School of Life Science, University of Hyogo, Hyogo 678-1297,  
Japan

<sup>4</sup>Department of Chemistry, Stanford University, Stanford, California 94305, USA

E-mail: wwnam@ewha.ac.kr

**Table S1.** Selected Bond Distances (Å) and Angles (°) for **1**-(ClO<sub>4</sub>)<sub>2</sub> and **3**-(ClO<sub>4</sub>)<sub>2</sub>

|           | <b>1</b> -(ClO <sub>4</sub> ) <sub>2</sub> | <b>3</b> -(ClO <sub>4</sub> ) <sub>2</sub> |
|-----------|--------------------------------------------|--------------------------------------------|
| Co1-N1    | 1.982(4)                                   | 2.068(4)                                   |
| Co1-N2    | 1.994(4)                                   | 2.015(8)                                   |
| Co1-N3    | 2.036(6)                                   |                                            |
| N1-Co1-N2 | 88.16(16)                                  | 102.06(14)                                 |
| N1-Co1-N3 | 101.27(17)                                 |                                            |
| N1-Co1-N4 | 101.61(17)                                 |                                            |

**Table S2.** EXAFS Least Squares Fitting Results

| Complex  | Coordination/Path      | R(Å) <sup>a</sup> | σ <sup>2</sup> (Å <sup>2</sup> ) <sup>b</sup> | E <sub>0</sub> (eV) | F <sup>c</sup> |
|----------|------------------------|-------------------|-----------------------------------------------|---------------------|----------------|
| <b>2</b> | 2 Co-O                 | 1.85              | 323                                           | 1.81                | 0.16           |
|          | 4 Co-N                 | 1.99              | 317                                           |                     |                |
|          | 8 Co-C <sup>d</sup>    | 2.84              | 393                                           |                     |                |
|          | 24 Co-C-N <sup>d</sup> | 3.14              | 382                                           |                     |                |
| <b>4</b> | 2 Co-O                 | 1.86              | 341                                           | 1.50                | 0.17           |
|          | 4 Co-N                 | 2.01              | 530                                           |                     |                |
|          | 8 Co-C <sup>d</sup>    | 2.86              | 549                                           |                     |                |
|          | 24 Co-C-N <sup>d</sup> | 3.16              | 473                                           |                     |                |

<sup>a</sup>The estimated standard deviations for the distances are in the order of ± 0.02 Å. <sup>b</sup>The σ<sup>2</sup> values are multiplied by 10<sup>5</sup>. <sup>c</sup>Error is given by  $\Sigma[(\chi_{\text{obsd}} - \chi_{\text{calcd}})^2 k^6] / \Sigma[(\chi_{\text{obsd}})^2 k^6]$ . <sup>d</sup>The single scattering contribution from the 4 methyl groups were not included while the multiple scattering contributions were required to obtain a good fit. The S<sub>0</sub><sup>2</sup> factor was set at 0.8.

**Table S3.** Selected DFT Parameters

| Model    | Structural Parameters               |                                |                                                  |                                 | Mayer Bond Order |      | Mulliken Charge                     |
|----------|-------------------------------------|--------------------------------|--------------------------------------------------|---------------------------------|------------------|------|-------------------------------------|
|          | Co-O <sub>1</sub> (O <sub>2</sub> ) | O <sub>1</sub> -O <sub>2</sub> | Co-N <sub>1</sub> (N <sub>2</sub> ) <sup>a</sup> | CoO <sub>1</sub> O <sub>2</sub> | Co-O             | O-O  | Co, O <sub>1</sub> , O <sub>2</sub> |
| <b>2</b> | 1.88<br>(1.88)                      | 1.44                           | 2.02<br>(2.05)                                   | 67.5                            | 0.89<br>(0.89)   | 0.77 | 0.35, -0.31, -0.31                  |
| <b>4</b> | 1.89<br>(1.91)                      | 1.42                           | 2.05<br>(2.10)                                   | 67.5                            | 0.88<br>(0.85)   | 0.82 | 0.39, -0.29, -0.28                  |

<sup>a</sup>The average of the trans Co-N<sub>1</sub>(N<sub>3</sub>) and Co-N<sub>2</sub>(N<sub>4</sub>) bond distances are represented by Co-N<sub>1</sub> and Co-N<sub>2</sub>, respectively.

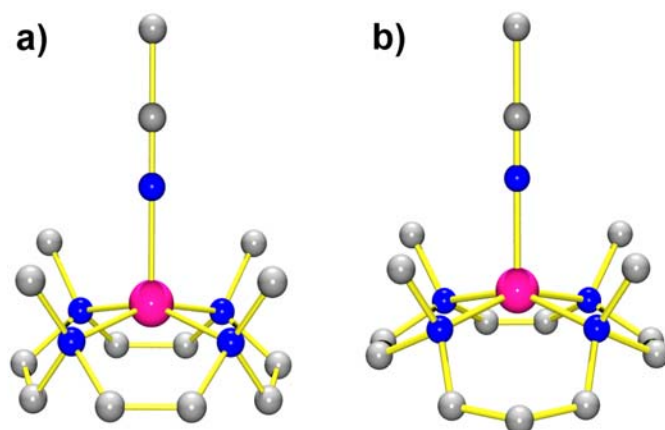

**Figure S1.** X-ray crystal structures of (a)  $[\text{Co}(12\text{-TMC})(\text{CH}_3\text{CN})]^{2+}$  (**1**) and (b)  $[\text{Co}(13\text{-TMC})(\text{CH}_3\text{CN})]^{2+}$  (**3**) (gray C, blue N, pink Co).

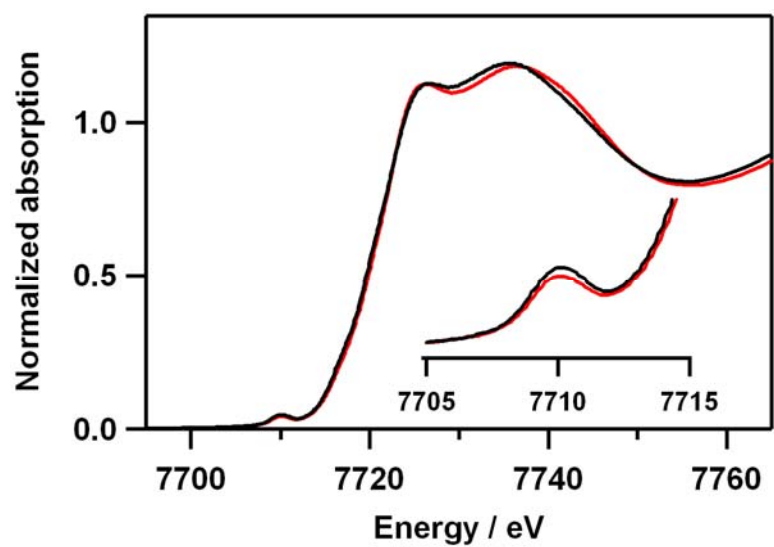

**Figure S2.** The normalized Co K-edge x-ray absorption spectra for **2** (—) and **4** (—). Inset shows the expanded pre-edge region.

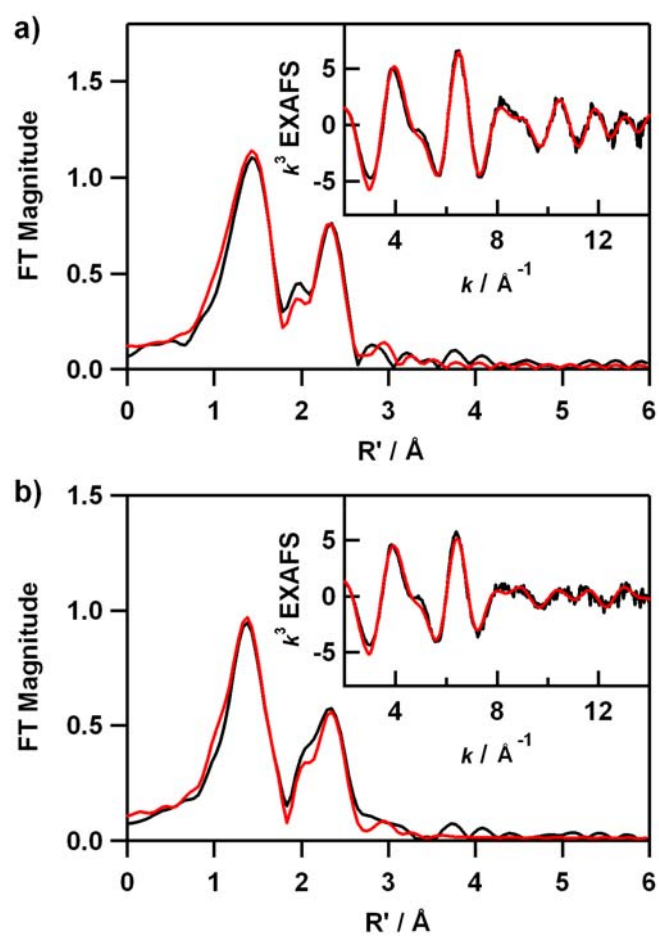

**Figure S3.** The  $k^3$  weighted Co K-edge EXAFS (inset) and their corresponding non-phase shift corrected Fourier transforms for **2** (a) and **4** (b); data (—) and fit (—).

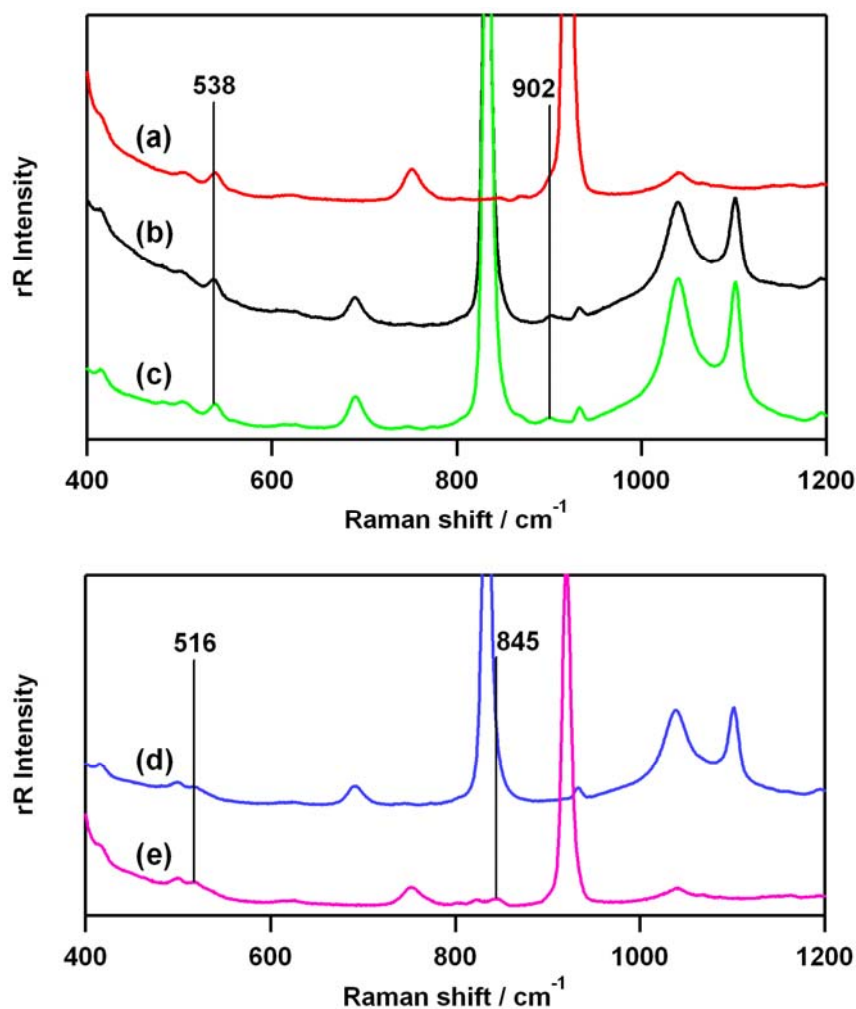

**Figure S4.** Resonance Raman spectra of  $2\text{-}^{16}\text{O}_2$  (32 mM) and  $2\text{-}^{18}\text{O}_2$  (32 mM) taken in  $\text{CD}_3\text{CN}$  and  $\text{CH}_3\text{CN}$ , respectively. (a) In situ-generated  $2\text{-}^{16}\text{O}_2$  prepared with  $\text{H}_2^{16}\text{O}_2$  in  $\text{CH}_3\text{CN}$ , (b) isolated  $2\text{-}^{16}\text{O}_2$  in  $\text{CD}_3\text{CN}$ , (c) in situ-generated  $2\text{-}^{16}\text{O}_2$  prepared with  $\text{H}_2^{16}\text{O}_2$  in  $\text{CD}_3\text{CN}$ , (d) in situ-generated  $2\text{-}^{18}\text{O}_2$  prepared with  $\text{H}_2^{18}\text{O}_2$  in  $\text{CD}_3\text{CN}$ , and (e) in situ-generated  $2\text{-}^{18}\text{O}_2$  prepared with  $\text{H}_2^{18}\text{O}_2$  in  $\text{CH}_3\text{CN}$ . Since the  $^{16}\text{O}\text{-}^{16}\text{O}$  stretching band at  $902\text{ cm}^{-1}$  and the  $^{18}\text{O}\text{-}^{18}\text{O}$  stretching band at  $845\text{ cm}^{-1}$  were severely overlapped with the strong  $\text{CH}_3\text{CN}$  and  $\text{CD}_3\text{CN}$  solvent peaks, respectively, the resonance Raman spectra of  $2\text{-}^{16}\text{O}_2$  and  $2\text{-}^{18}\text{O}_2$  were taken in different solvents such as  $\text{CD}_3\text{CN}$  for  $2\text{-}^{16}\text{O}_2$  and  $\text{CH}_3\text{CN}$  for  $2\text{-}^{18}\text{O}_2$ .



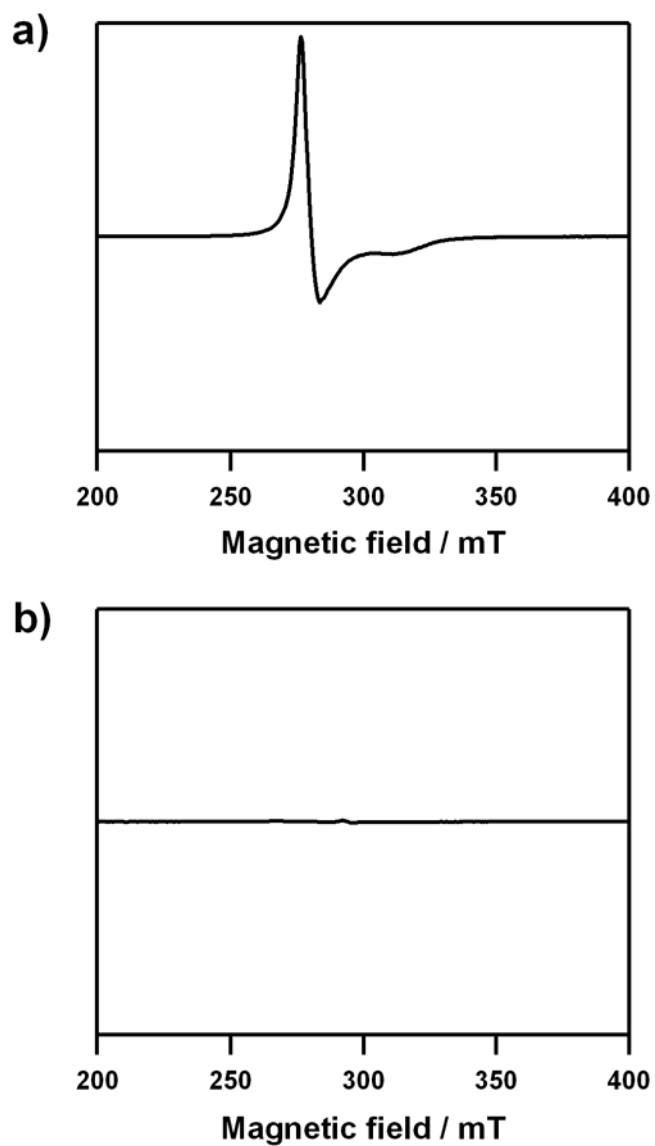

**Figure S5.** X-band EPR spectra of a)  $[\text{Co}(\text{12-TMC})(\text{CH}_3\text{CN})]^{2+}$  (**1**) ( $g$  values = 2.31, 2.07) and b)  $[\text{Co}(\text{12-TMC})(\text{O}_2)]^+$  (**2**) in frozen  $\text{CH}_3\text{CN}$  at 4.3 K. Instrumental parameters: microwave power = 0.998 mW, frequency = 9.10 GHz, sweep width = 0.5 T, modulation amplitude = 0.2 mT.

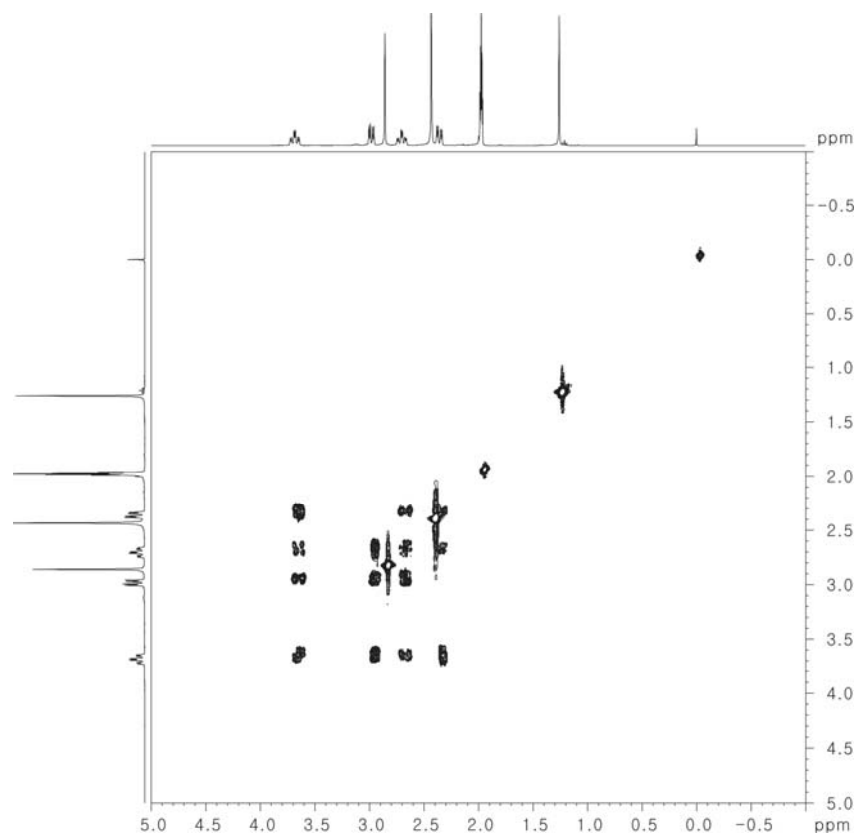

**Figure S6.** COSY spectrum of  $[\text{Co}(12\text{-TMC})(\text{O}_2)]^+$  (**2**) in acetonitrile- $d_3$  at  $-40\text{ }^\circ\text{C}$ .

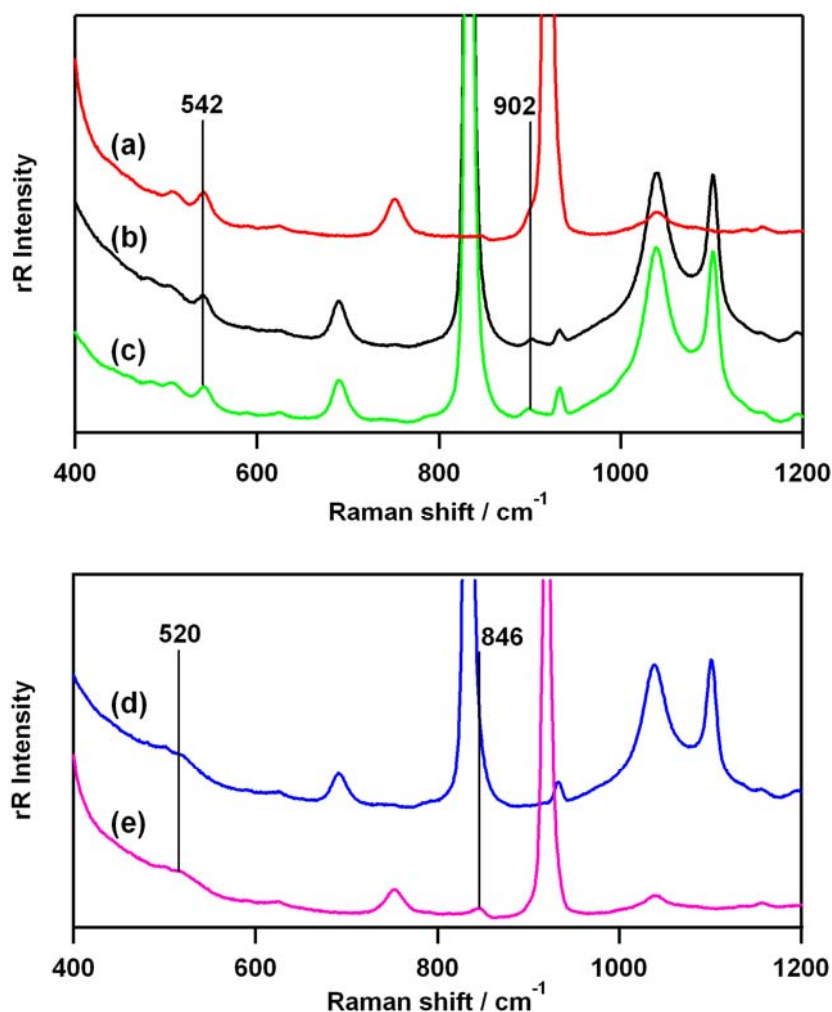

**Figure S7.** Resonance Raman spectra of  $4\text{-}^{16}\text{O}_2$  (32 mM) and  $4\text{-}^{18}\text{O}_2$  (32 mM) taken in  $\text{CD}_3\text{CN}$  and  $\text{CH}_3\text{CN}$ , respectively. (a) In situ-generated  $4\text{-}^{16}\text{O}_2$  prepared with  $\text{H}_2^{16}\text{O}_2$  in  $\text{CH}_3\text{CN}$ , (b) isolated  $4\text{-}^{16}\text{O}_2$  in  $\text{CD}_3\text{CN}$ , (c) in situ-generated  $4\text{-}^{16}\text{O}_2$  prepared with  $\text{H}_2^{16}\text{O}_2$  in  $\text{CD}_3\text{CN}$ , (d) in situ-generated  $4\text{-}^{18}\text{O}_2$  prepared with  $\text{H}_2^{18}\text{O}_2$  in  $\text{CD}_3\text{CN}$ , and (e) in situ-generated  $4\text{-}^{18}\text{O}_2$  prepared with  $\text{H}_2^{18}\text{O}_2$  in  $\text{CH}_3\text{CN}$ . Since the  $^{16}\text{O}\text{-}^{16}\text{O}$  stretching band at  $902\text{ cm}^{-1}$  and the  $^{18}\text{O}\text{-}^{18}\text{O}$  stretching band at  $846\text{ cm}^{-1}$  were severely overlapped with the strong  $\text{CH}_3\text{CN}$  and  $\text{CD}_3\text{CN}$  solvent peaks, respectively, the resonance Raman spectra of  $4\text{-}^{16}\text{O}_2$  and  $4\text{-}^{18}\text{O}_2$  were taken in different solvents such as  $\text{CD}_3\text{CN}$  for  $4\text{-}^{16}\text{O}_2$  and  $\text{CH}_3\text{CN}$  for  $4\text{-}^{18}\text{O}_2$ .

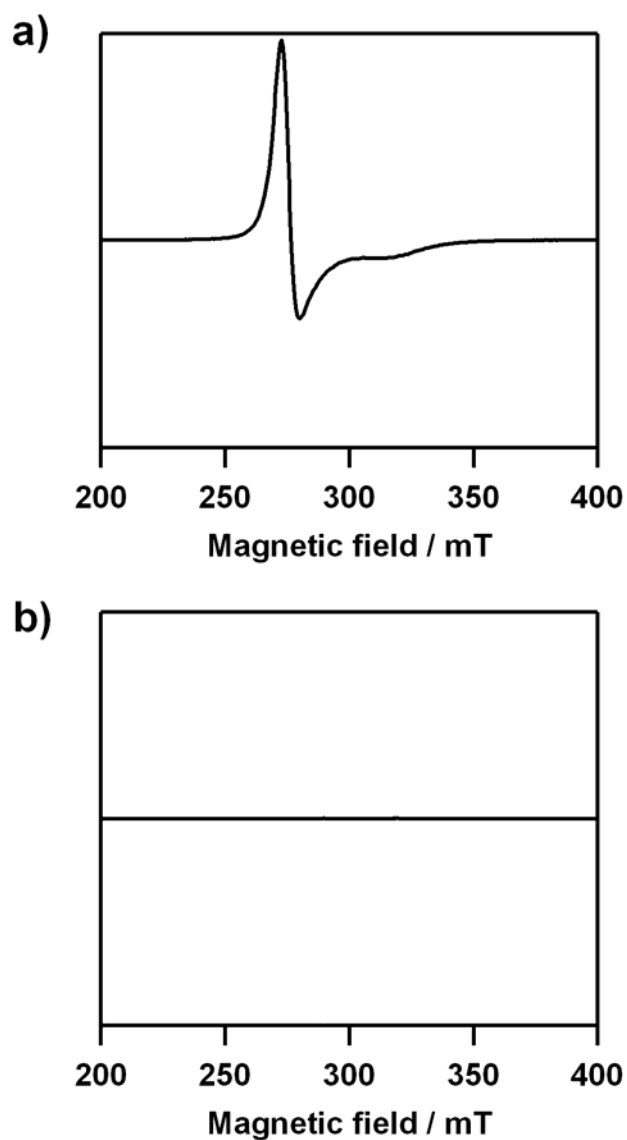

**Figure S8.** X-band EPR spectra of (a)  $[\text{Co}(\text{13-TMC})(\text{CH}_3\text{CN})]^{2+}$  (**3**) ( $g$  values = 2.35, 2.05) and (b)  $[\text{Co}(\text{13-TMC})(\text{O}_2)]^+$  (**4**) in frozen  $\text{CH}_3\text{CN}$  at 4.3 K. Instrumental parameters: microwave power = 0.998 mW, frequency = 9.10 GHz, sweep width = 0.5 T, modulation amplitude = 0.5 mT.

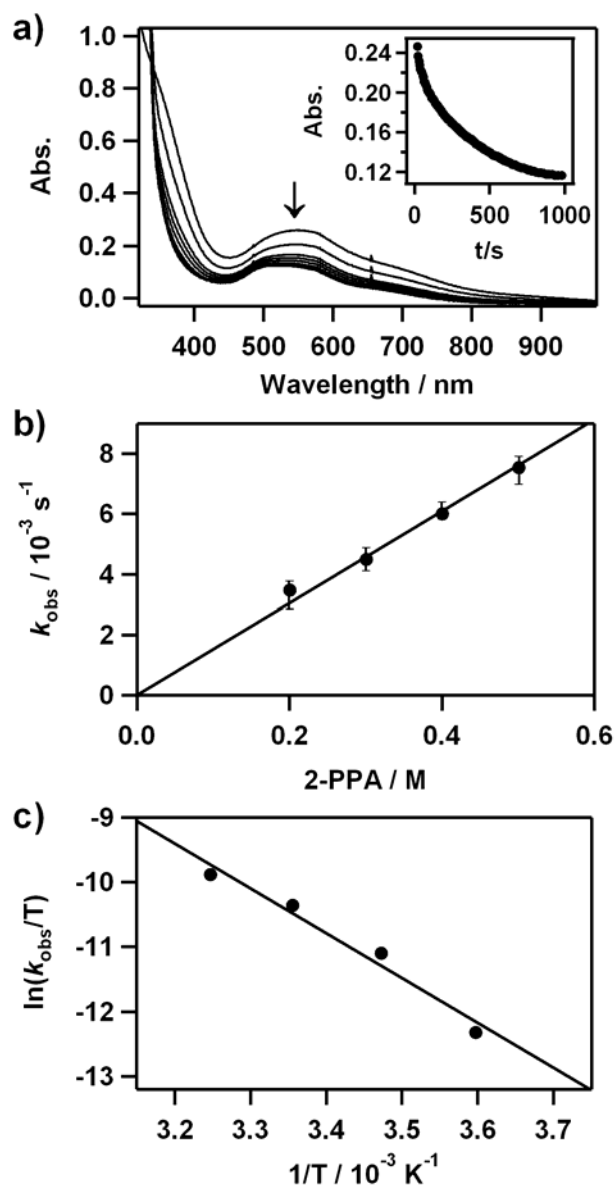

**Figure S9.** Reactions of  $[\text{Co}(\text{13-TMC})(\text{O}_2)]^+$  (**4**) with 2-phenylpropionaldehyde (2-PPA) in  $\text{CH}_3\text{CN}$  at  $25^\circ\text{C}$ . a) UV-vis spectral changes of **4** (2 mM) upon addition of 100 equiv of 2-PPA. Inset shows the time course of the absorbance at 562 nm. b) Plot of  $k_{\text{obs}}$  against 2-PPA concentration to determine a second-order rate constant. c) Plot of first-order rate constants against  $1/T$  to determine activation parameters for the reaction of **4** (2 mM) and 100 equiv of 2-PPA.

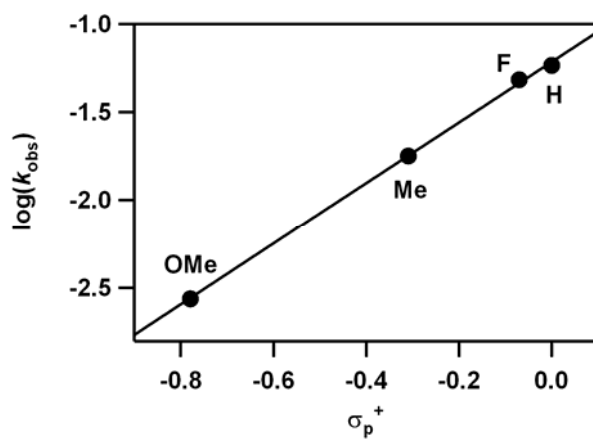

**Figure S10.** Hammett plot for the oxidation of *para*-substituted benzaldehydes, *para*-X-Ph-CHO

(X = OMe, Me, F, H), by  $[\text{Co}(\text{13-TMC})(\text{O}_2)]^+$  (**4**) in  $\text{CH}_3\text{CN}$  at 25 °C

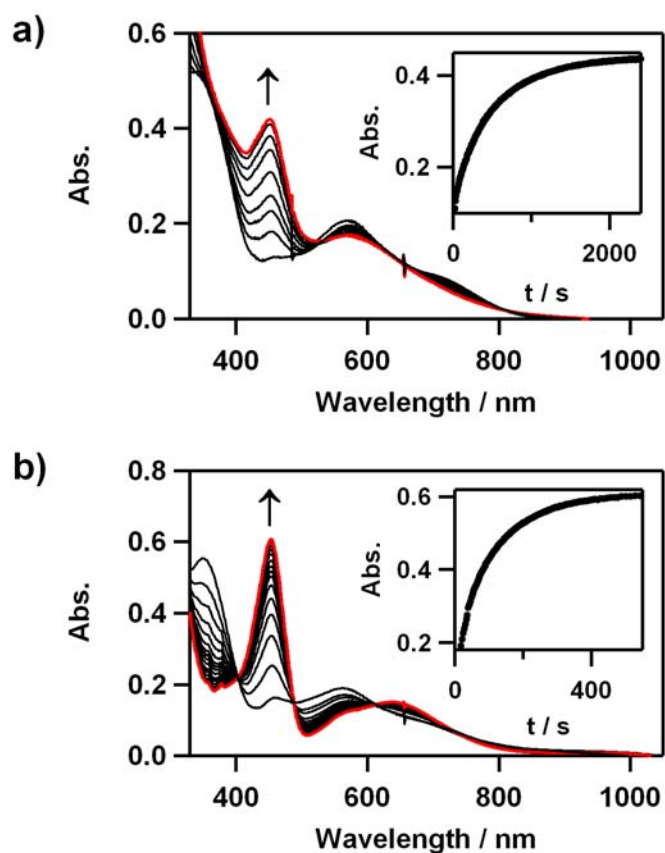

**Figure S11.** a) UV-vis spectral changes of  $[\text{Co}(\text{12-TMC})(\text{O}_2)]^+$  (**2**) (1 mM) upon addition of 15 equiv  $[\text{Mn}(\text{14-TMC})]^{2+}$  in acetone at 0 °C. Inset shows the time course of the absorbance at 453 nm. b) UV-vis spectral changes of  $[\text{Co}(\text{13-TMC})(\text{O}_2)]^+$  (**4**) (1 mM) upon addition of 10 equiv  $[\text{Mn}(\text{14-TMC})]^{2+}$  in acetone at -30 °C. Inset shows the time course of the absorbance at 453 nm.
